# Supplementary material for: Mechanisms governing target search and binding dynamics of hypoxia-inducible factors
Source: eLife journal article supplement (doi:10.7554/elife.75064), 2022-11-02
Supplement: fig1-data1 [file elife-75064-fig1-data1-v2.zip]

Left multi-channel blot image shows that this gel was cut in half and each was blotted with a different antibody

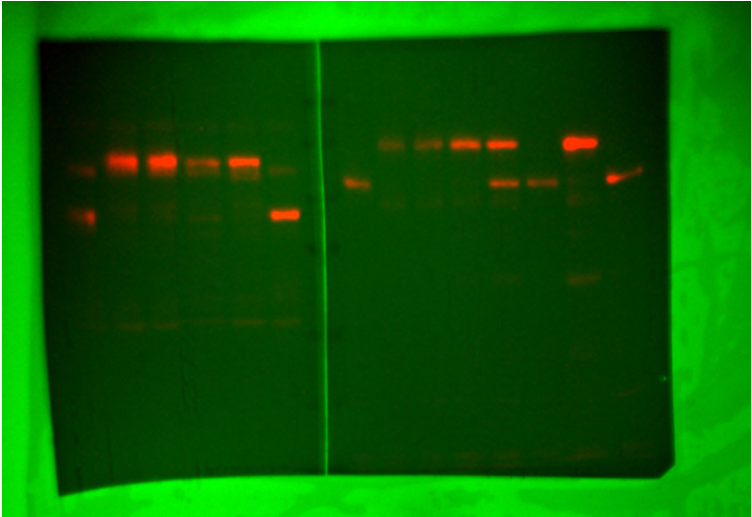

multichannel blot image showing anti-HIF1b and anti-HIF2a signal over the membrane

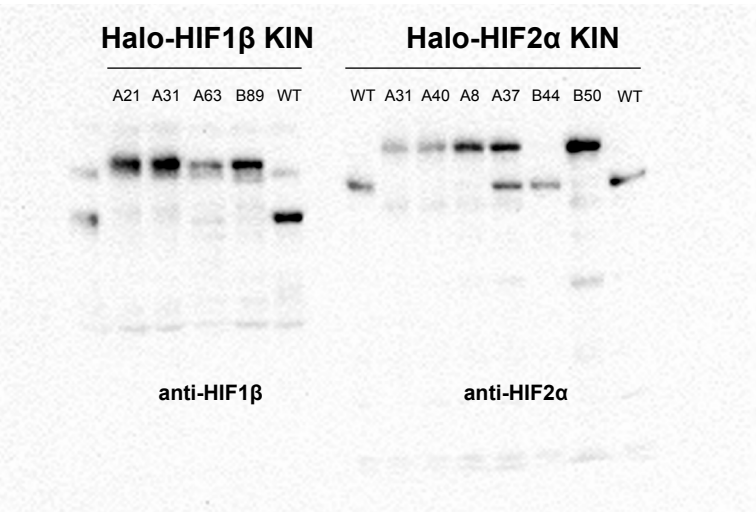

Original uncropped image for anti-HIF1b and anti-HIF2a signals

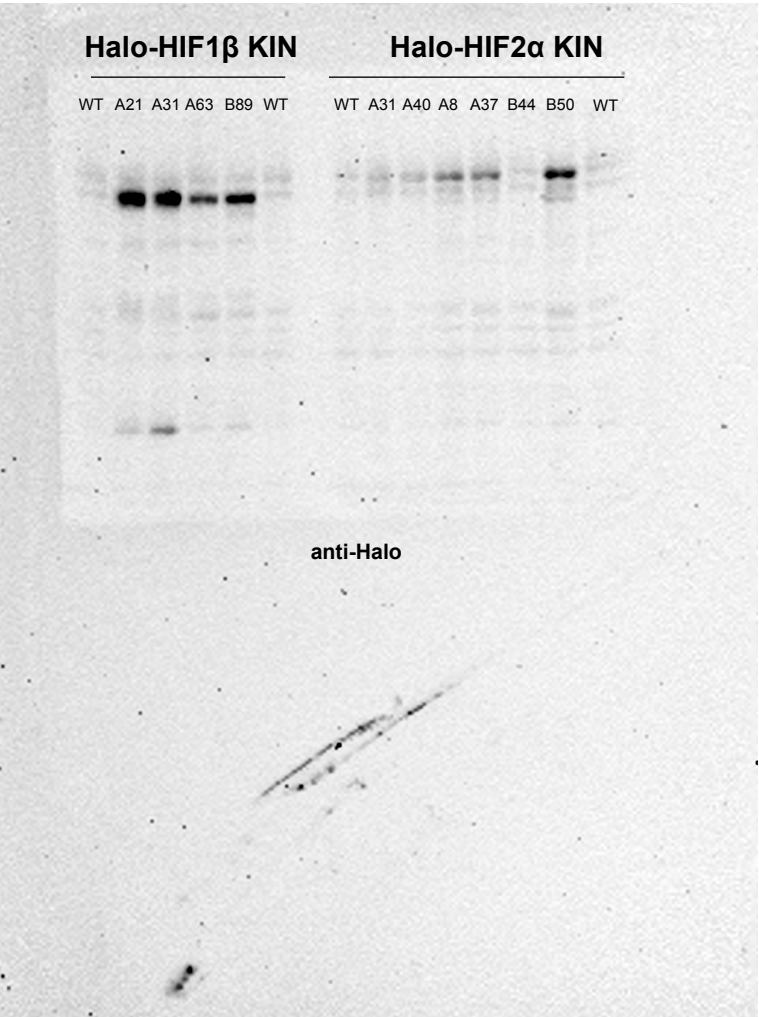

Original uncropped image for anti-Halo signals

Left multi-channel blot image shows TBP loading control for the three piece of membranes

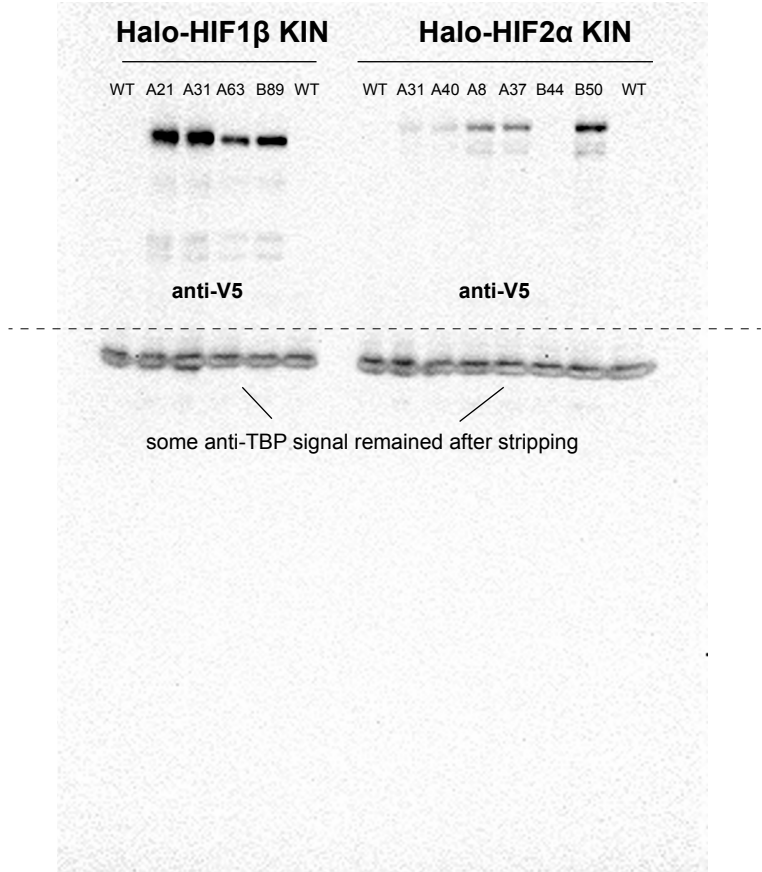

Original uncropped image for anti-V5 signals

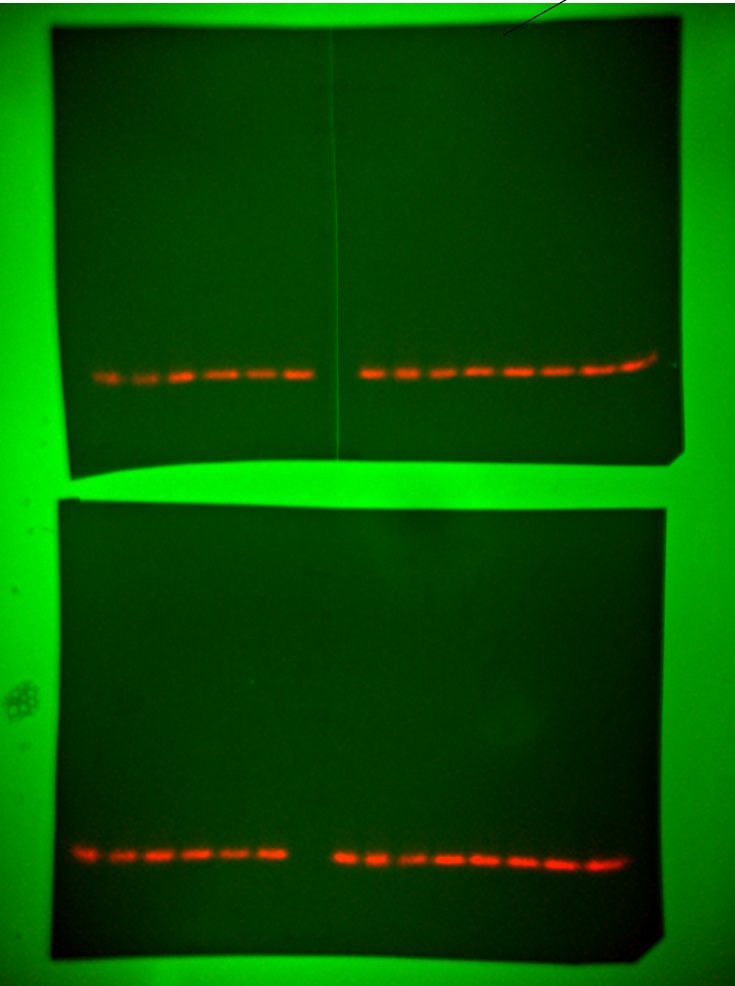

multichannel blot image showing anti-TBP singals over the membranes

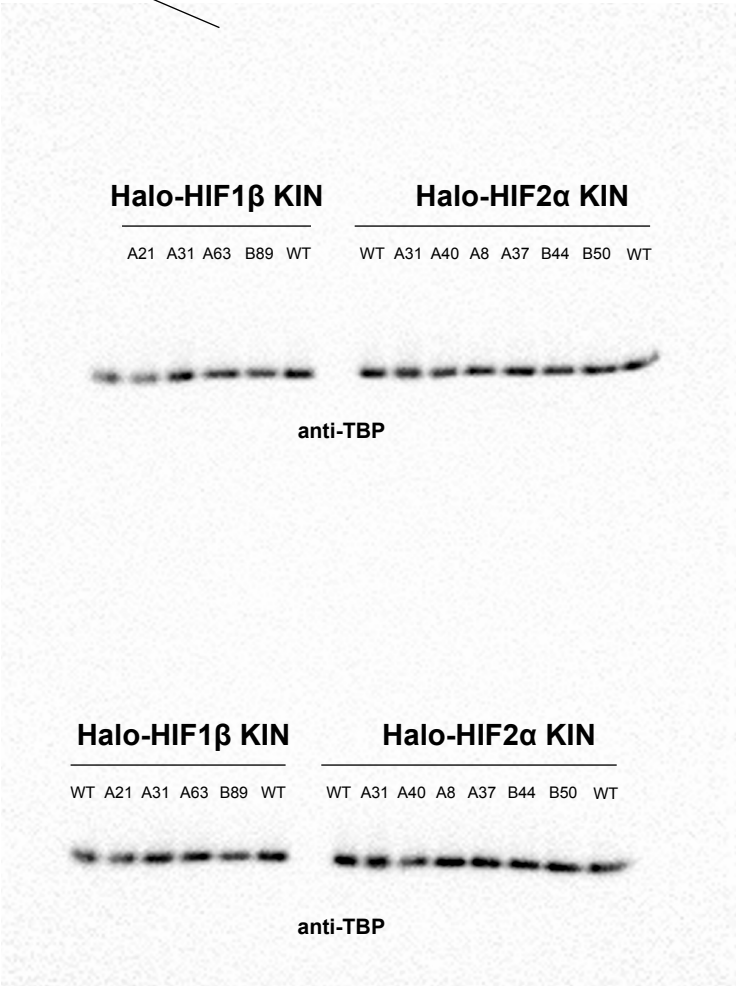

Original uncropped image for anti-TBP signals
