# Supplementary material for: Mechanisms governing target search and binding dynamics of hypoxia-inducible factors
Source: eLife journal article supplement (doi:10.7554/elife.75064), 2022-11-02
Supplement: fig4-figsupp1-data1 [file elife-75064-fig4-figsupp1-data1-v2.zip]

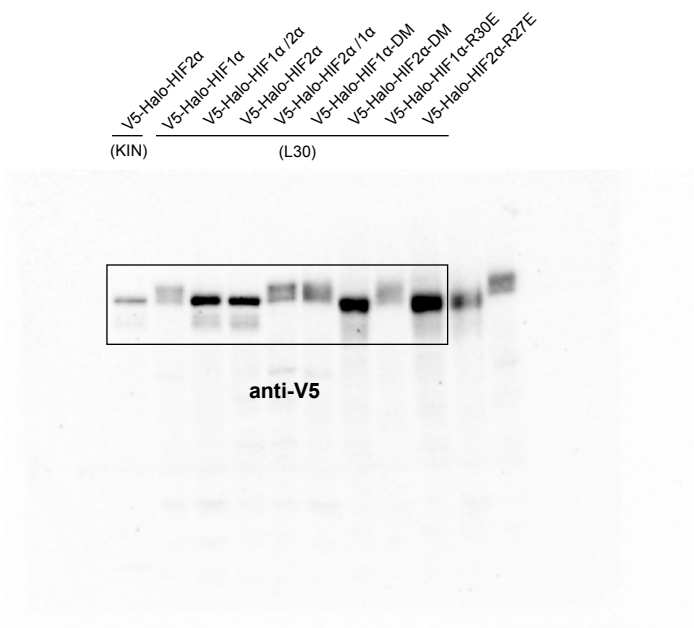

Original uncropped image for anti-V5 signals

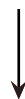

same membrane reblotted with  
TBP antibody after stripping

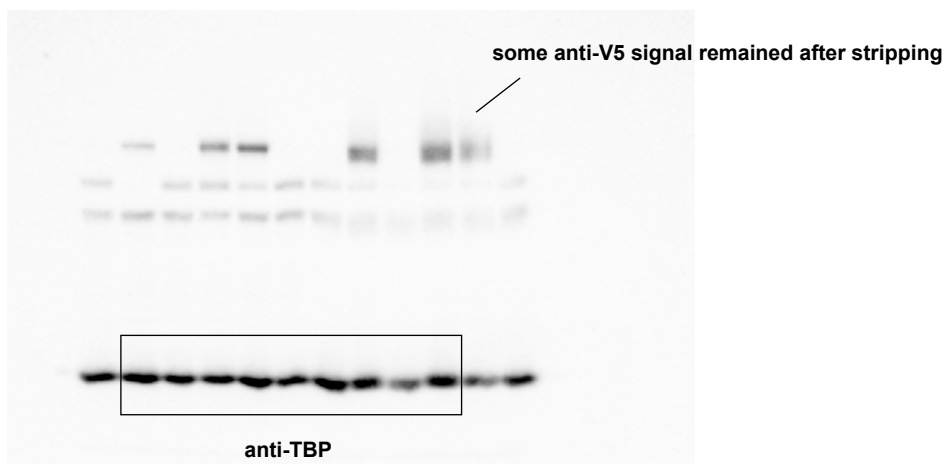

Original uncropped image for anti-TBP signals
