# Supplementary material for: Mechanisms governing target search and binding dynamics of hypoxia-inducible factors
Source: eLife. 2022 Nov 2;11:e75064. doi: 10.7554/eLife.75064 (PMC9681212; doi:10.7554/eLife.75064)
Supplement: Figure 1—source data 1. [file elife-75064-fig1-data1.zip]

Archive with 16 entries (15 files):
- Figure 1 - source data 1/
- __MACOSX/._Figure 1 - source data 1
- Figure 1 - source data 1/multichannel blot image showing anti-HIF1b and anti-HIF2a signal over the membrane.tif
- __MACOSX/Figure 1 - source data 1/._multichannel blot image showing anti-HIF1b and anti-HIF2a signal over the membrane.tif
- Figure 1 - source data 1/Original uncropped image for anti-HIF1b and anti-HIF2a signals.tif
- __MACOSX/Figure 1 - source data 1/._Original uncropped image for anti-HIF1b and anti-HIF2a signals.tif
- Figure 1 - source data 1/Original uncropped image for anti-Halo signals.tif
- __MACOSX/Figure 1 - source data 1/._Original uncropped image for anti-Halo signals.tif
- Figure 1 - source data 1/Original uncropped image for anti-V5 signals.tif
- __MACOSX/Figure 1 - source data 1/._Original uncropped image for anti-V5 signals.tif
- Figure 1 - source data 1/multichannel blot image showing anti-TBP singals over the membranes.tif
- __MACOSX/Figure 1 - source data 1/._multichannel blot image showing anti-TBP singals over the membranes.tif
- Figure 1 - source data 1/Original uncropped image for anti-TBP signals.tif
- __MACOSX/Figure 1 - source data 1/._Original uncropped image for anti-TBP signals.tif
- Figure 1 - source data 1/Figure of all uncropped blots with relavent bands labeled.pdf
- __MACOSX/Figure 1 - source data 1/._Figure of all uncropped blots with relavent bands labeled.pdf
