# Supplementary material for: Mechanisms governing target search and binding dynamics of hypoxia-inducible factors
Source: eLife. 2022 Nov 2;11:e75064. doi: 10.7554/eLife.75064 (PMC9681212; doi:10.7554/eLife.75064)
Supplement: Supplementary file 1. [file elife-75064-supp1.xlsx]

## Sheet: Sheet1
Figures	Condition	# of cells	# of trajectories	Bound Fraction (molecules with diff_coef < 0.1)	mean_free_diff_coef (molecules with diff_coef > 0.5)	mode_diff_coef
Figure 2 and Figure 2—figure supplement 2	A31	75	8426	0.380022	7.57472	6.0256
	A21	75	8274	0.245362	10.545	10
	B50	83	10461	0.419465	7.45461	6.30957
	B89	77	7362	0.249582	10.4447	9.54993
	A21	79	6583	0.160536	9.96571	9.12011
	A21+2a	144	6037	0.497817	8.42481	3.98107
	A21+2aDM	82	5336	0.221809	9.2668	8.31764
Figure 3 and Figure 3—figure supplement 2	A21+DMSO	60	7936	0.226742	9.61967	9.54993
	A21+Belzutifan	60	6738	0.15412	9.7111	9.54993
	A21+ctrl+DMSO	60	7563	0.232509	9.74089	9.54993
	A21+ctrl+Belzutifan	60	7070	0.157597	9.97821	9.54993
	A21+2a+DMSO	90	12307	0.54282	6.39539	3.98107
	A21+2a+Belzutifan	66	11111	0.328168	8.80106	9.12011
	A21+1a2a+DMSO	80	6360	0.451839	7.18266	4.57088
	A21+1a2a+Belzutifan	81	7551	0.509299	7.84809	6.0256
	A21+1a+DMSO	66	17952	0.279544	6.40971	6.30957
	A21+1a+Belzutifan	65	16666	0.276986	6.71878	6.0256
	A21+2a1a+DMSO	60	8144	0.296429	7.42906	6.0256
	A21+2a1a+Belzutifan	60	7839	0.19488	8.73925	8.70964
	A21+1aNT+DMSO	60	12107	0.268901	8.52896	8.31764
	A21+1aNT+Belzutifan	60	10727	0.252225	8.80569	8.70964
	A21+2aNT+DMSO	60	11169	0.215096	8.43887	8.31764
	A21+2aNT+Belzutifan	60	9741	0.290945	8.56683	8.31764
Figure 3—figure supplement 1	A31+Belzutifan_0.0002 μM	43	5306	0.42852	7.5592	3.80189
	A31+Belzutifan_0.002 μM	47	5525	0.417093	7.34383	4.7863
	A31+Belzutifan_0.005 μM	50	5610	0.446604	8.96615	6.91831
	A31+Belzutifan_0.01 μM	62	5554	0.340676	8.12608	6.0256
	A31+Belzutifan_0.02 μM	58	6118	0.324663	9.41877	6.91831
	A31+Belzutifan_0.2 μM	65	6337	0.284089	8.85635	6.60693
Fig 4 and Figure 4—figure supplement 2	A31 (KIN)	60	15040	0.395897	7.68758	6.91831
	2a (L30)	61	17407	0.363028	6.56938	6.60693
	1a2a (L30)	71	18677	0.387337	7.01774	6.60693
	1a (L30)	66	18806	0.207762	7.17821	7.24436
	2a1a (L30)	60	19979	0.160178	6.6183	7.58578
Figure 5B	2a (L30)	72	5675	0.469766	6.98257	3.98107
	2a R27E (L30)	60	7572	0.255369	6.77317	6.60693
	1a (L30)	73	6745	0.253949	6.81429	5.7544
	1a R30E (L30)	65	12362	0.083097	6.46416	6.91831
Figure 5D	2a (L30)	104	6331	0.423768	6.09075	5.01187
	2a DM (L30)	77	7619	0.111	5.5716	4.57088
	1a (L30)	77	7579	0.318741	5.83255	4.36516
	1a DM (L30)	72	9452	0.101552	5.73993	5.01187
